# Supplementary material for: Achieving high-capacity aqueous supercapacitors via anion-doped construction of dual redox centers in NixCo1−xSeO3
Source: Royal Society of Chemistry journal article supplement (doi:10.1039/d4cp00454j), 2024-01-01
Supplement: d4cp00454j1.pdf [file d4cp00454j1.pdf]

## Supporting Information

### **Achieving high-capacity aqueous supercapacitors via anion-doped construction of dual redox centers in $\text{Ni}_x\text{Co}_{1-x}\text{SeO}_3$**

*Tao Li, Jinyue Song, Hongguang Fan, Yanpeng Wang, Yusheng Luo,  
Chenchen Shao, Qingping Li and Wei Liu\**

School of Materials Science and Engineering, Ocean University of China,  
Qingdao 266100, People's Republic of China. E-mail: weiliu@ouc.edu.cn

(W. Liu)

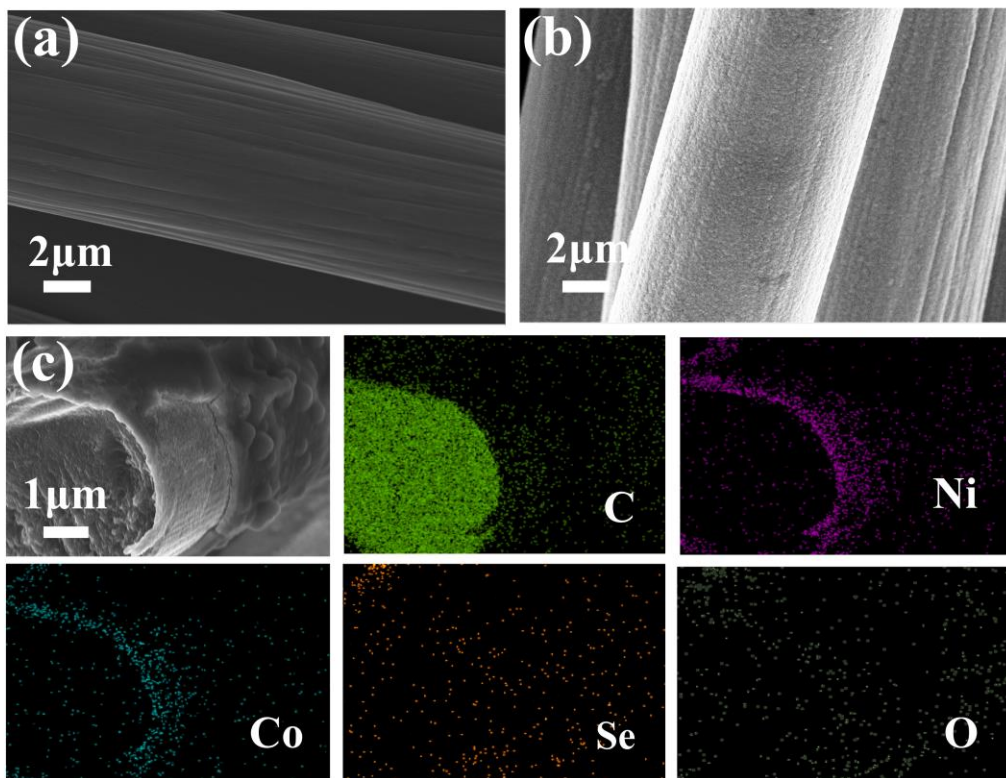

**Fig. S1** SEM of (a) CC (b)NiCC. (c)The cross-section image and element distribution pictures of the NCSel-NCl-NiCC composite.

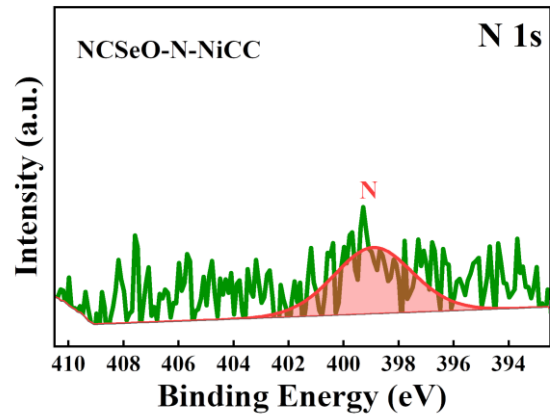

**Fig. S2** N1s High-resolution XPS spectra of NCSelO-N-NiCC samples.

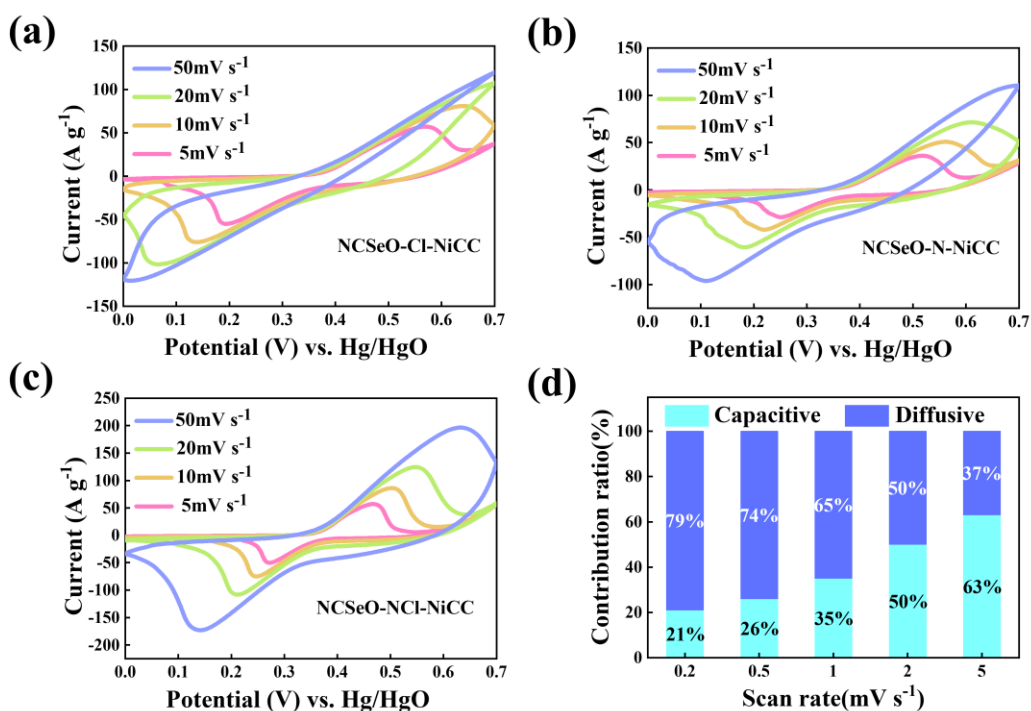

**Fig. S3** CV curves of (a) NCSeO-Cl-NiCC (b) NCSeO-N-NiCC (c)NCSeO-NCl-NiCC at different scan rates from 5 to 50 mV s<sup>-1</sup>. (d) voltage drops under high current densities of different electrodes. (e) The percentage of capacitive/diffusion-controlled contribution to the charge storage of NCSeO-Cl-NiCC electrode at different scan rates.

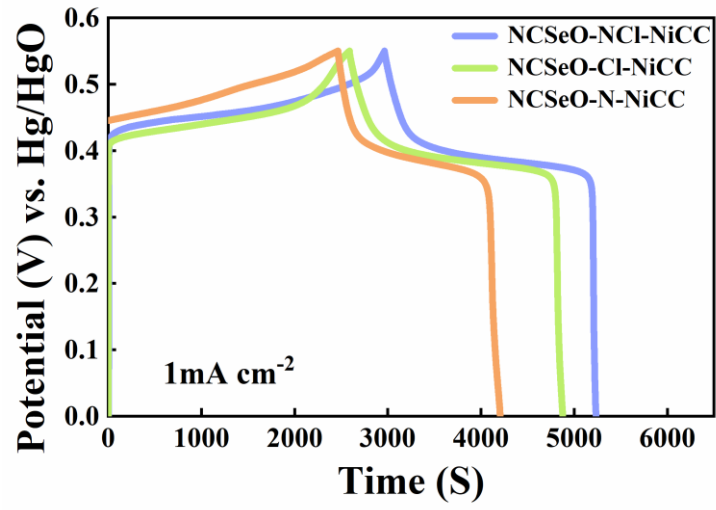

**Fig. S4** GCD curve of NCSeO-NiCC, NCSeO-Cl-NiCC and NCSeO-N-NiCC electrode at 1 mA cm<sup>-2</sup> current density.

**Table S1.** Comparison of electrochemical performance of NCSeO-NCl-NiCC electrodes with NiCo-Oxides and NiCo-Selenides reported in the literature.

| <b>Material</b>                           | <b>Electrochemical performance</b>                              | <b>Ref</b>           |
|-------------------------------------------|-----------------------------------------------------------------|----------------------|
| NiCo <sub>2</sub> O <sub>4</sub>          | 70.7 mAh g <sup>-1</sup> , 1.5 A g <sup>-1</sup> (--)           | 1                    |
| NiO/Co <sub>3</sub> O <sub>4</sub> /rGO   | 108 mAh g <sup>-1</sup> , 2 A g <sup>-1</sup> (5000, 92%)       | 2                    |
| N-NiCoO-2                                 | 131.6 mAh g <sup>-1</sup> , 1 A g <sup>-1</sup> (5000, 93.3%)   | 3                    |
| NiCo-LDH                                  | 272.5 mAh g <sup>-1</sup> , 1 A g <sup>-1</sup> (3000, 73.3%)   | 4                    |
| NiCo-LDH-PMB/CC                           | 298.6 mAh g <sup>-1</sup> , 1 A g <sup>-1</sup> (--)            | 5                    |
| NiCoSe/G-10                               | 117 mAh g <sup>-1</sup> , 1 A g <sup>-1</sup> (5000, 84.2%)     | 6                    |
| NiSe/CoSe/Ni <sub>3</sub> Se <sub>2</sub> | 185.1 mAh g <sup>-1</sup> , 0.5 A g <sup>-1</sup> (5000, 85.2%) | 7                    |
| NiSe <sub>2</sub> @CNT                    | 136.2 mAh g <sup>-1</sup> , 1 A g <sup>-1</sup> (9000 82%)      | 8                    |
| <b>NCSeO-NCl-NiCC</b>                     | <b>417 mAh g<sup>-1</sup>, 1 A g<sup>-1</sup> (7000, 98.4%)</b> | <b>This<br/>work</b> |

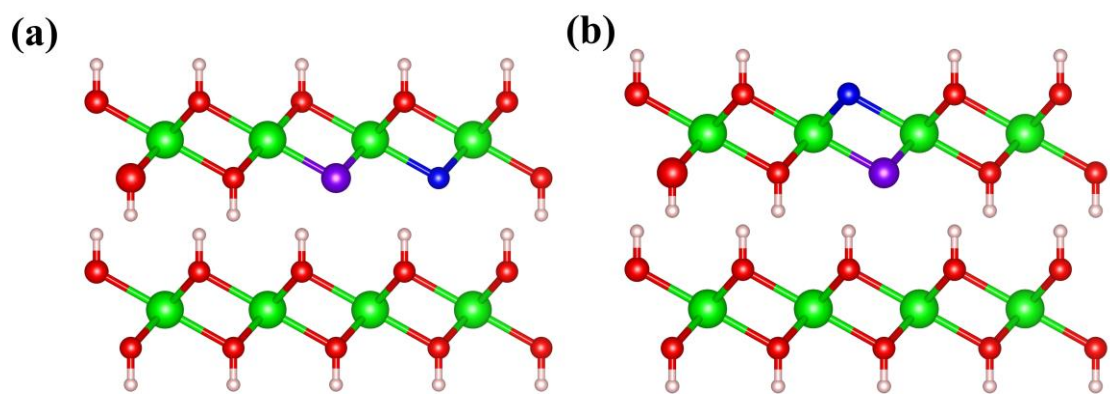

**Fig. S5** The crystal structure of (a) NCS<sub>2</sub>O-NCl-NiCC-1, (b) NCS<sub>2</sub>O-NCl-NiCC-2.  
(The grey, red, pink, blue and purple balls are Ni, O, H, N and Cl atoms, respectively.)

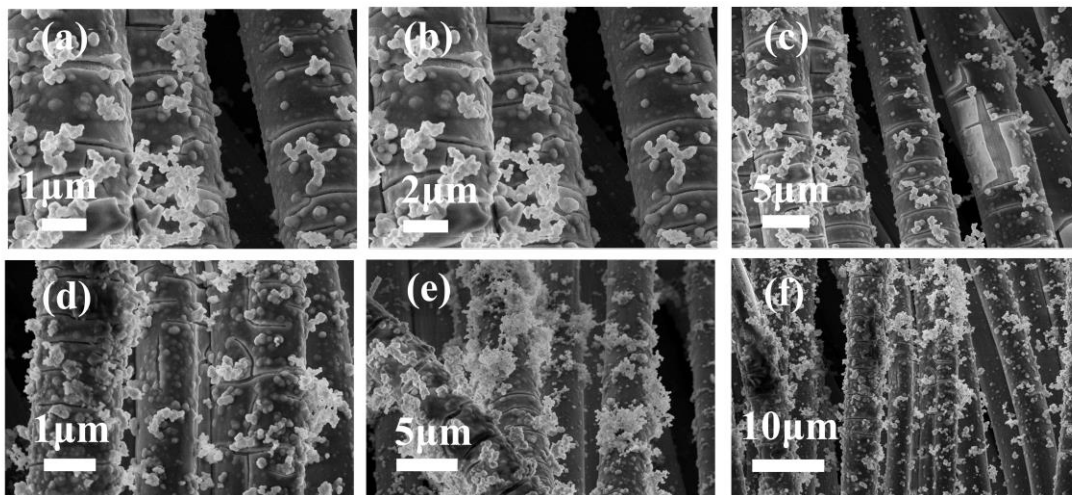

**Fig. S6** After 300 cycles SEM images of (a) NCSiO-Cl-NiCC.(b) NCSiO-Cl-NiCC.



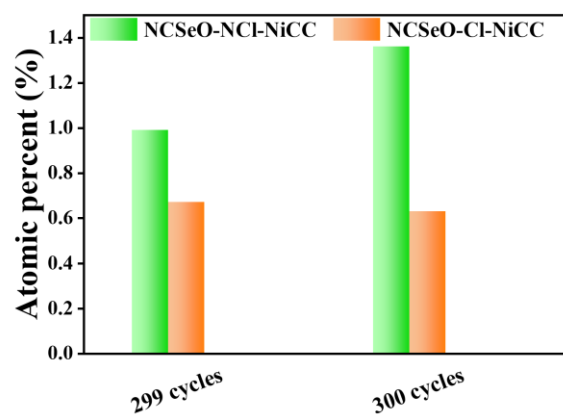

**Fig. S7** Cl atomic percents in NCSO-NCl-NiCC in different state.

## Reference

1. Y. Y. Kannangara, S. Karunaratne, W. P. S. L. Wijesinghe, C. Sandaruwan, C. R. Ratwani, A. R. Kamali and A. M. Abdelkader, *J. Energy Storage*, 2024, **84**.
2. R. Kumar, R. Thangappan, F. Ran, S. Sambasivam, M. D. Albaqami and S. Mohammad, *J. Energy Storage*, 2024, **85**.
3. Y. Li, Y. Shan and H. Pang, *Chin. Chem. Lett.*, 2020, **31**, 2280-2286.
4. X. Zhang, W. Lu, Y. Tian, S. Yang, Q. Zhang, D. Lei and Y. Zhao, *J. Colloid Interface Sci.*, 2022, **606**, 1120-1127.
5. W. Tang, J. Bai, P. Zhou, Q. He, F. Xiao, M. Zhao, P. Yang, L. Liao, Y. Wang, P. He, B. Jia and L. Bian, *Electrochim. Acta*, 2023, **439**.
6. Y. Wang, F. Mo and X. Wu, *J. Electroanal. Chem.*, 2022, **924**.
7. L. Zhu, X. Liu, W. Du, J. Fu, X. Yang, X. Chai, W. Guo, P. Shuang, Y. Zhang and Y. Zhang, *Journal of Alloys and Compounds*, 2022, **925**.
8. Y. Zheng, Y. Tian, S. Sarwar, J. Luo and X. Zhang, *Journal of Power Sources*, 2020, **452**.
